# Supplementary material
Source: PubMed Central journal article supplement (PMC1567094)
Supplement: NIHMS4405-supplement-SI.pdf [file NIHMS4405-supplement-SI.pdf]

## Supplementary Figures

### **Figure S1: Monoexponential deuterium exchange rates in HET-s(218-289) fibrils.**

Peak volumes of representative residues are plotted versus the logarithm of the exchange time  $t_{\text{ex}}$ . Data are shown for V223 (red), T233 (violet), E234 (green), V245 (yellow), E265 (cyan) and Y281 (blue). Smooth solid lines represent fits of the data to a monoexponential equation.

### **Figure S2: Deuterium exchange rates of residues 218-289 in full length HET-s.**

Observed exchange rates  $k_{\text{ex}} / \text{h}^{-1}$  are plotted against the amino acid sequence of residues 218-289 of HET-s. Exchange time points were collected between 20 minutes and 3696 hours. The measurable upper limit was  $15 \text{ h}^{-1}$ . Blue arrows indicate the location of  $\beta$ -strands determined for the fragment HET-s(218-289).

### **Figure S3: Sequence comparison of the $\beta 1\beta 2$ (226-246) and $\beta 3\beta 4$ (262-282) regions of the HET-s prion forming domain**

Amino acid sequence (a) and nucleotide sequence alignments (b) were performed with the ClustalW algorithm. Identical residues are boxed in black and similar residues are boxed in grey.

**Figure S4:** Electron micrographs of aggregates of recombinant wild-type and mutant HET-s proteins. Negatively stained aggregates of wild-type and mutant HET-s 226P, 246P and 266P protein are shown. (scale bar is 100 nm). Mutant HET-s 226P, 246P and 266P proteins were expressed in *E. coli* and purified. The aggregation of HET-s 226P and 266P was very inefficient but small amounts of fibrillar material could be detected by electron microscopy.

**Figure S5:** One-dimensional traces from the 2D spectra shown in Figure 1c,d. Trace a is from the up-down tangential sweep at 40 kHz MAS frequency, the C $\beta$ /C' crosspeak is positive because this is a two step transfer, trace b is from the down-up sweep and the C $\alpha$ /C' peak is a one-step transfer which leads to negative peaks. Traces c and d are from the 25 kHz spectrum.

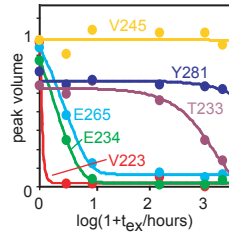

Supplementary Figure S1

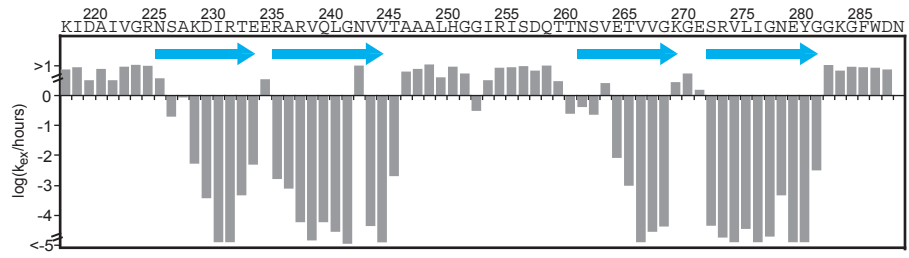

Supplementary Figure S2

a

|                  |     |                        |
|------------------|-----|------------------------|
| $\beta 1\beta 2$ | 226 | NSAKDNRTEERARVQIGNVVT  |
| $\beta 3\beta 4$ | 262 | NSVETWVGKGEISRVLIGNEYG |

b

|                  |                                                                 |
|------------------|-----------------------------------------------------------------|
| $\beta 1\beta 2$ | AACTCGGTAGACACGGTTGTGGGGAAGCGCGAGTCTAGGCTCCTTATTCCAAATCAGTACGCA |
| $\beta 3\beta 4$ | AATTCGCCAAGGATATCAGAACAGAGCAACGTGCAAGGCTCCAGCTCCGCAATCTTGTCACT  |

Supplementary Figure S3

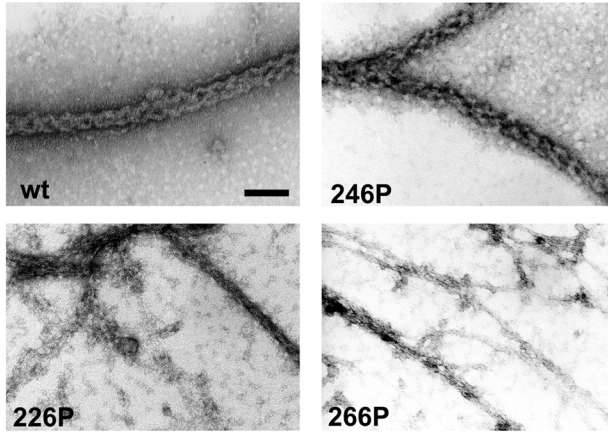

Supplementary Figure S4

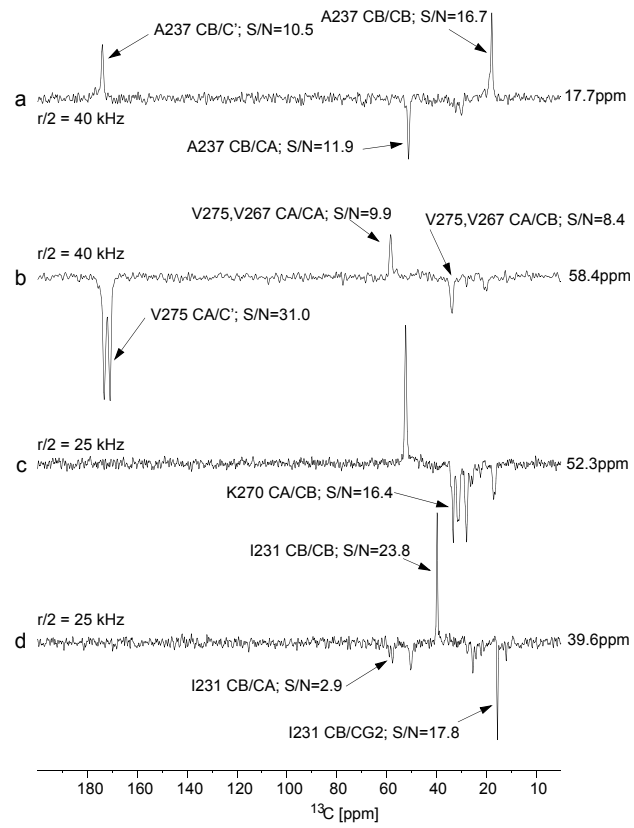

Supplementary Figure S5

Supplementary Table 1 **Activity of *het-s* mutants in heterokaryon incompatibility and [Het-s] infectivity assays**

| HET-s mutation | positives in cell death reaction | positives in infectivity assay | positives in infectivity assay after subculturing |
|----------------|----------------------------------|--------------------------------|---------------------------------------------------|
| vector         | 0 (0/24)                         | 2 (1/48)                       | 2 (1/48)                                          |
| wt             | 81 (144/177)                     | 100 (40/40)                    | 100 (24/24)                                       |
| 220 P          | 95 (45/47)                       | 100 (32/32)                    | 95 (20/21)                                        |
| 226 P          | 5 (3/64)                         | 0 (0/32)                       | 0 (0/24)                                          |
| 230 P          | 4 (2/47)                         | 8 (2/24)                       | 0 (0/24)                                          |
| 235 P          | 9 (8/93)                         | 38 (12/32)                     | 33 (8/24)                                         |
| 240 P          | 10 (5/48)                        | 60 (19/32)                     | 0 (0/11)                                          |
| 246 P          | 87 (60/69)                       | 100 (16/16)                    | 88 (7/8)                                          |
| 253 P          | 79 (37/47)                       | 100 (32/32)                    | 100 (12/12)                                       |
| 260 P          | 92 (74/80)                       | 100 (32/32)                    | 100 (5/5)                                         |
| 266 P          | 12 (8/64)                        | 22 (7/32)                      | 48 (11/23)                                        |
| 270 P          | 5 (3/55)                         | 41 (13/32)                     | 8 (2/24)                                          |
| 276 P          | 5 (3/64)                         | 33 (16/48)                     | 8 (2/24)                                          |
| 280 P          | 10 (5/48)                        | 0 (0/24)                       | 0 (0/24)                                          |
| 284 P          | 83 (41/49)                       | 100 (16/16)                    | 50 (12/24)                                        |
| Δ225-230       | 0 (0/48)                         | 0 (0/32)                       | n.d.                                              |
| Δ244-248       | 2 (1/46)                         | 0 (0/32)                       | n.d.                                              |
| Δ251-253       | 82 (37/45)                       | 100 (32/32)                    | 75 (18/24)                                        |
| Δ253-255       | 70 (17/24)                       | 100 (16/16)                    | n.d.                                              |
| Δ252-256       | 53 (18/34)                       | 50 (5/10)                      | 48 (11/23)                                        |
| Δ248-256       | 0 (0/24)                         | 0 (0/24)                       | 0 (0/48)                                          |
| Δ258-262       | 0 (0/48)                         | 0 (0/16)                       | 4 (1/24)                                          |
| Δ276-279       | 0 (0/24)                         | 0 (0/24)                       | n.d.                                              |

Deletion and proline-scanning *het-s* mutants are listed. The first column gives the percentage of transformants producing a cell death reaction when confronted with a *het-S* tester strain. The number of positives over the total number of tested transformants is given in parentheses. The second column and third column gives the percentage of transformants that were able to infect a wild-type [Het-s\*] prion-free recipient strain. In the experiments reported in the second column, transformants were tested immediately after contact with a wild-type [Het-s] prion-infected donor strain. In the experiments reported in the third column, the transformants were first subcultured for 3 days after their initial contact with the wild-type [Het-s] donor strain. (n.d., not determined). Spontaneous appearance of [Het-s] is in the range of 2 % in the tested conditions.



Supplementary table 2 **Infectivity of mutant recombinant HET-s 226P, 246P and 266P proteins in biolistic assay**

| protein | [Het-s]-positives |
|---------|-------------------|
| buffer  | 0 (0/32)          |
| wt      | 100 % (64/64)     |
| 226 P   | 25% (9/36)        |
| 246 P   | 97% (39/40)       |
| 266 P   | 67% (20/30)       |

Percentage of [Het-s]-positive transformants obtained after biolistic introduction of the listed proteins is given together with the number of positives over the total number of tested strains.
